# Supplementary material for: Testing the Role of Natural and Sexual Selection on Testes Size Asymmetry in Anurans
Source: MDPI journal article supplement (doi:10.3390/biology12020151), 2023-01-18

**Table S1.** Dataset used for all analyses. Sample size (N), latitude, body size (snout-vent length: SVL) (mm), left and right testis mass (mg), livers mass (mg), precipitation seasonality (coefficient of variation), temperature seasonality (standard deviation  $\times 100$ ), mating system and adult sex ratio used for this study. Mating systems are abbreviated as follows: 1= monandry and 2= polyandry. Adult sex ratio (ASR: defined as the number of males to the number of fertilisable females).

| Species                               | N | Latitude | SVL    | Precipitation seasonality | Temperature seasonality | Left testis | Right testis | Livers mass | Mating system | ASR   |
|---------------------------------------|---|----------|--------|---------------------------|-------------------------|-------------|--------------|-------------|---------------|-------|
| <i>Amolops chunganensis</i>           | 4 | 32°41'   | 35.64  | 74.74                     | 776.77                  | 16.8        | 15.2         | 145.9       | 1             | 0.923 |
| <i>Amolops granulosus</i>             | 4 | 32°41'   | 33.28  | 74.74                     | 776.77                  | 6.97        | 6.74         | 85.4        | 1             | 0.8   |
| <i>Amolops kangtingensis</i>          | 4 | 30°4'    | 50.66  | 98.49                     | 604.64                  | 16.41       | 15.28        | 119.4       | 1             | 0.75  |
| <i>Amolops lifanensis</i>             | 4 | 32°31'   | 52.8   | 83.77                     | 718.77                  | 35.9        | 30.4         | 497.6       | 1             | 1.333 |
| <i>Amolops loloensis</i>              | 4 | 29°1'    | 51.42  | 89.45                     | 588.56                  | 29.88       | 25.55        | 911.7       | 1             | 1.071 |
| <i>Amolops mantzorum</i>              | 4 | 30°32'   | 53.8   | 81.24                     | 671.66                  | 67.8        | 67.4         | 250.8       | 1             | 0.714 |
| <i>Amolops ricketti</i>               | 4 | 26°22'   | 51.36  | 66.24                     | 736.7                   | 21.07       | 19.23        | 466.1       | 1             | 1     |
| <i>Amolops sinensis</i>               | 4 | 28°37'   | 52.55  | 66.24                     | 736.7                   | 79.9        | 67.2         | 428.4       | 1             | 0.929 |
| <i>Amolops torrentis</i>              | 4 | 18°43'   | 52.56  | 73.9                      | 310.59                  | 14.51       | 14.48        | 159.2       | 1             | 1.182 |
| <i>Amolops yunkaiensis</i>            | 4 | 22°16'   | 46.16  | 73.07                     | 501.11                  | 23.52       | 19.29        | 139.2       | 1             | 0.85  |
| <i>Aquixalus palpebralis</i>          | 4 | 22°54'   | 27.11  | 86.42                     | 420.22                  | 1.101       | 1.099        | 16.4        | 2             | 0.692 |
| <i>Babina daunchina</i>               | 4 | 29°35'   | 48.32  | 88.66                     | 692.39                  | 48.9        | 41.7         | 210.2       | 1             | 1.333 |
| <i>Bombina maxima</i>                 | 4 | 27°43'   | 58.1   | 81.33                     | 505                     | 86.9        | 79.4         | 441.6       | 1             | 0.82  |
| <i>Brachytarsophrys chuannanensis</i> | 4 | 27°17'   | 102.16 | 89.09                     | 541.91                  | 662.16      | 447.14       | 2328.1      | 1             | 0.72  |
| <i>Brachytarsophrys feae</i>          | 4 | 26°22'   | 99.42  | 61.98                     | 714.21                  | 574.3       | 412.9        | 1441.8      | 1             | 0.56  |
| <i>Bufo andrewsi</i>                  | 4 | 30°32'   | 74.7   | 81.24                     | 671.66                  | 131.9       | 100.5        | 637.2       | 1             | 1.273 |
| <i>Bufo gargarizans</i>               | 4 | 30°48'   | 99.5   | 80.45                     | 764.04                  | 287.3       | 230.1        | 3441.3      | 1             | 1.444 |
| <i>Bufo melanostictus</i>             | 4 | 25°58'   | 64.43  | 62.64                     | 750.5                   | 89.7        | 74.5         | 381.7       | 1             | 1.2   |
| <i>Bufo minshanicus</i>               | 4 | 32°41'   | 67.5   | 81.19                     | 666.92                  | 141.5       | 120.2        | 1172.5      | 1             | 1.091 |
| <i>Bufo raddei</i>                    | 4 | 40°2'    | 46.22  | 105.9                     | 1148.4                  | 145.25      | 89.2         | 284.6       | 1             | 0.714 |

|                                     |   |        |        |       |        |        |       |        |   |       |
|-------------------------------------|---|--------|--------|-------|--------|--------|-------|--------|---|-------|
| <i>Bufo tibetanus</i>               | 4 | 29°59′ | 64.87  | 94.5  | 621.84 | 99.6   | 83.7  | 1470.3 | 1 | 1.167 |
| <i>Calluella yunnanensis</i>        | 4 | 24°32′ | 31.98  | 78.95 | 416.81 | 3.05   | 2.93  | 56.2   | 2 | 0.8   |
| <i>Chirixalus doriae</i>            | 4 | 21°55′ | 26.1   | 73.9  | 310.59 | 4.58   | 4.72  | 81.9   | 2 |       |
| <i>Chirixalus vittatus</i>          | 4 | 18°43′ | 24.14  | 75.89 | 350.14 | 2.8    | 3     | 41     | 2 |       |
| <i>Feirana quadranus</i>            | 4 | 32°38′ | 71.1   | 80.13 | 765.58 | 426.2  | 310.2 | 986.9  | 2 | 1.81  |
| <i>Fejervarya limnocharis</i>       | 4 | 28°37′ | 37.5   | 86.1  | 742.51 | 26.2   | 24    | 137.2  | 1 | 1.2   |
| <i>Hyla annectans chuanxiensis</i>  | 4 | 30°32′ | 33.88  | 81.24 | 671.66 | 4.97   | 4.75  | 48.4   | 2 | 0.889 |
| <i>Hyla annectans jingdongensis</i> | 5 | 22°57′ | 33.5   | 82.93 | 438.87 | 6.75   | 6.25  | 45.6   | 2 | 1.25  |
| <i>Hyla annectans wulingensis</i>   | 4 | 27°52′ | 33.9   | 60.44 | 773.19 | 1.64   | 1.67  | 16.1   | 2 |       |
| <i>Hyla chinensis</i>               | 4 | 22°16′ | 28.2   | 73.07 | 501.11 | 2.12   | 2.08  | 46.7   | 2 | 1.12  |
| <i>Hyla sanchiangensis</i>          | 4 | 27°52′ | 33.85  | 60.44 | 773.19 | 2.27   | 2.43  | 26.6   | 2 |       |
| <i>Hyla tsinlingensis</i>           | 4 | 30°36′ | 34.26  | 61.13 | 765.76 | 4.83   | 3.37  | 78.6   | 2 |       |
| <i>Hylarana guentheri</i>           | 4 | 30°22′ | 58.8   | 86.1  | 742.51 | 94.7   | 90    | 368    | 1 | 1.167 |
| <i>Hylarana nigrotympanica</i>      | 4 | 20°0′  | 45.12  | 82.02 | 340.44 | 6.34   | 5.89  | 236.7  | 1 | 0.875 |
| <i>Kaloula pulchra</i>              | 4 | 20°0′  | 54.62  | 82.02 | 340.44 | 25.62  | 18.24 | 568.3  | 1 | 1.071 |
| <i>Kaloula rugifera</i>             | 4 | 31°37′ | 38.9   | 99.79 | 725.39 | 9.7    | 9.5   | 116.4  | 1 | 0.5   |
| <i>Kaloula verrucosa</i>            | 4 | 25°3′  | 39.2   | 83.22 | 435.76 | 7.78   | 7.22  | 119.6  | 1 | 0.6   |
| <i>Leptobrachella bijie</i>         | 4 | 27°54′ | 25.36  | 73.36 | 717.81 | 4.34   | 3.86  | 18.4   | 1 | 0.714 |
| <i>Leptobrachella feii</i>          | 4 | 22°56′ | 22.56  | 79.78 | 699.4  | 2.11   | 2.09  | 27.6   | 1 | 0.857 |
| <i>Leptobrachium boringii</i>       | 4 | 28°42′ | 60.2   | 84.83 | 434.87 | 37.2   | 31.3  | 325.3  | 1 | 1.333 |
| <i>Leptolalax oshanensis</i>        | 4 | 22°0′  | 29.59  | 80.18 | 331.07 | 2.96   | 2.94  | 24.3   | 1 | 0.813 |
| <i>Leptolalax vencruiseunctatus</i> | 4 | 20°0′  | 25.8   | 82.02 | 340.44 | 3.01   | 2.99  | 23.1   | 1 | 0.882 |
| <i>Limnonectes fujianensis</i>      | 4 | 30°36′ | 52.58  | 61.13 | 765.76 | 12.2   | 11.5  | 216    | 1 | 1.333 |
| <i>Lithobates catesbeinaus</i>      | 4 | 30°22′ | 168.52 | 86.1  | 742.51 | 1568.2 | 969.4 | 3929.6 | 1 | 1.143 |
| <i>Megophrys daweimontis</i>        | 4 | 22°56′ | 44.19  | 84.83 | 434.87 | 23.29  | 19.97 | 227.3  | 1 | 1.214 |
| <i>Megophrys jingdongensis</i>      | 4 | 24°32′ | 30.22  | 78.95 | 416.81 | 8.38   | 7.87  | 38.2   | 1 | 1     |
| <i>Megophrys kuatunensis</i>        | 4 | 22°16′ | 29.2   | 73.07 | 501.11 | 2.27   | 2.23  | 48.5   | 1 | 0.8   |
| <i>Megophrys major</i>              | 4 | 22°54′ | 49.16  | 86.42 | 420.22 | 87.2   | 65.44 | 342.4  | 1 | 1.333 |
| <i>Megophrys minor</i>              | 4 | 29°34′ | 42.13  | 91.61 | 684.5  | 8.1    | 7.5   | 140    | 1 | 1     |

|                                |   |        |       |       |        |        |        |        |   |       |
|--------------------------------|---|--------|-------|-------|--------|--------|--------|--------|---|-------|
| <i>Megophrys omeimontis</i>    | 4 | 29°34′ | 58.42 | 94.31 | 692.33 | 164.23 | 101.5  | 478.2  | 1 | 1.286 |
| <i>Megophrys parva</i>         | 4 | 22°0′  | 39.22 | 80.18 | 331.07 | 8.79   | 8.62   | 75.5   | 1 | 0.857 |
| <i>Megophrys shapingensis</i>  | 4 | 29°1′  | 70.61 | 89.45 | 588.56 | 143.21 | 102.45 | 2104.1 | 1 | 1.24  |
| <i>Megophrys spinata</i>       | 4 | 26°24′ | 47.64 | 61.44 | 726.11 | 81.8   | 69.6   | 215.8  | 1 | 0.857 |
| <i>Microhyla berdmorei</i>     | 4 | 22°0′  | 26.28 | 80.18 | 331.07 | 8.87   | 8.65   | 30.5   | 1 | 0.667 |
| <i>Microhyla butleri</i>       | 4 | 19°59′ | 20.95 | 61.01 | 748.78 | 3.8    | 3.6    | 22.3   | 1 | 0.5   |
| <i>Microhyla heymonsi</i>      | 4 | 26°30′ | 21.42 | 62.64 | 750.5  | 3.6    | 3.4    | 16.8   | 1 | 0.5   |
| <i>Microhyla mixtura</i>       | 4 | 26°30′ | 20.8  | 61.01 | 748.78 | 5.36   | 5.64   | 7.6    | / | 0.6   |
| <i>Microhyla ornata</i>        | 4 | 30°49′ | 24.4  | 81.72 | 761.3  | 8.46   | 8.34   | 35.5   | 1 | 0.556 |
| <i>Microhyla pulchra</i>       | 4 | 25°58′ | 32.58 | 62.64 | 750.5  | 2.33   | 2.14   | 43.3   | 1 | 0.833 |
| <i>Micryletta inornata</i>     | 4 | 21°55′ | 25.92 | 75.89 | 350.14 | 1.88   | 2.03   | 11.4   | 1 | 0.9   |
| <i>Nanorana parkeri</i>        | 4 | 30°31′ | 50.27 | 120.6 | 708.85 | 32.29  | 31.24  | 86.7   | 1 | 0.85  |
| <i>Nanorana pleskei</i>        | 4 | 32°58′ | 31.03 | 79.64 | 706.83 | 30     | 27.5   | 121.4  | 1 | 0.714 |
| <i>Nanorana ventripunctata</i> | 4 | 27°33′ | 39.25 | 62.54 | 545.58 | 9.56   | 8.69   | 66.3   | 1 | 0.444 |
| <i>Nidirana leishanensis</i>   | 4 | 26°22′ | 54.7  | 61.64 | 725.31 | 18.5   | 16.4   | 243.1  | 1 | 1.182 |
| <i>Nidirana yae</i>            | 4 | 28°36′ | 54.03 | 66.12 | 733.31 | 24.9   | 24     | 139.9  | 1 | 1.2   |
| <i>Occidozyga lima</i>         | 4 | 19°59′ | 23.36 | 80.18 | 331.07 | 2.13   | 2.07   | 13.1   | 1 | 0.8   |
| <i>Occidozyga martensii</i>    | 4 | 22°0′  | 19.8  | 68.63 | 410.31 | 4.75   | 4.55   | 22     | 1 | 1.125 |
| <i>Odorrana grahami</i>        | 4 | 25°3′  | 67.6  | 83.22 | 435.76 | 29.2   | 24.3   | 433    | 1 | 1.267 |
| <i>Odorrana graminea</i>       | 4 | 28°36′ | 47.4  | 73.9  | 310.59 | 9.1    | 9      | 110.5  | 1 | 1.5   |
| <i>Odorrana hainanensis</i>    | 4 | 18°43′ | 52.7  | 73.9  | 310.59 | 10.4   | 10.3   | 177.2  | 1 | 1.125 |
| <i>Odorrana hejiangensis</i>   | 4 | 28°36′ | 46.6  | 66    | 732.34 | 42.9   | 36.3   | 151.3  | 1 | 1.304 |
| <i>Odorrana huanggangensis</i> | 4 | 26°22′ | 44.62 | 61.85 | 705.52 | 45.26  | 44.37  | 85.3   | 1 | 1.091 |
| <i>Odorrana kuangwuensis</i>   | 4 | 32°41′ | 56.35 | 74.74 | 776.77 | 12.56  | 12.54  | 199.4  | 1 | 1     |
| <i>Odorrana kweichowensis</i>  | 4 | 28°7′  | 45.12 | 65.21 | 749.76 | 9.83   | 8.76   | 151.6  | 1 | 1.182 |
| <i>Odorrana lungshengensis</i> | 4 | 26°22′ | 65.29 | 61.98 | 714.21 | 78.92  | 60.45  | 586.2  | 1 | 1.222 |
| <i>Odorrana margaretae</i>     | 4 | 28°7′  | 72    | 65.21 | 749.76 | 28.7   | 27.8   | 643.9  | 1 | 1.263 |
| <i>Odorrana nanjiangensis</i>  | 4 | 32°35′ | 57.53 | 82.66 | 777.95 | 22.5   | 19.7   | 364.7  | 1 | 1.4   |
| <i>Odorrana nasuta</i>         | 4 | 29°12′ | 59.45 | 91.78 | 691.19 | 16.3   | 15.9   | 230.9  | 1 | 1.25  |

|                                  |   |        |        |       |        |        |       |        |   |       |
|----------------------------------|---|--------|--------|-------|--------|--------|-------|--------|---|-------|
| <i>Odorrana schmackeri</i>       | 4 | 22°54' | 47.7   | 86.42 | 420.22 | 25.6   | 22.3  | 279.5  | 1 | 1.2   |
| <i>Odorrana tiannanensis</i>     | 4 | 18°43' | 61.25  | 73.9  | 310.59 | 27.16  | 22.35 | 572.3  | 1 | 1.636 |
| <i>Ophryophryne microstoma</i>   | 4 | 22°57' | 30.26  | 81.21 | 444.96 | 3.42   | 3.21  | 45.5   | 1 | 1.167 |
| <i>Oreolalax rugosus</i>         | 4 | 28°55' | 44.92  | 92.28 | 548.69 | 11.76  | 9.18  | 141.9  | 1 | 0.64  |
| <i>Paa boulengeri</i>            | 4 | 29°36' | 73.5   | 93.53 | 695.33 | 203.6  | 144.5 | 803.9  | 1 | 1.286 |
| <i>Paa robertingeri</i>          | 4 | 28°36' | 77.48  | 66    | 732.34 | 155.4  | 126.1 | 686.2  | 1 | 1.077 |
| <i>Paa sichuanensis</i>          | 4 | 25°57' | 85.14  | 65.65 | 449.76 | 281.9  | 176.2 | 1913.9 | 1 | 1.25  |
| <i>Paa yunnanensis</i>           | 4 | 25°3'  | 60.6   | 83.22 | 435.76 | 258.6  | 192.1 | 696.2  | 1 | 0.938 |
| <i>Pelophylax fukienensis</i>    | 4 | 26°7'  | 51.1   | 59.54 | 667.41 | 24.9   | 22.5  | 211.5  | 1 | 0.68  |
| <i>Pelophylax hubeiensis</i>     | 4 | 29°47' | 41.8   | 70.99 | 743.08 | 90.5   | 77.2  | 280.2  | 1 | 1.167 |
| <i>Pelophylax nigromaculatus</i> | 4 | 30°50' | 67.9   | 81.48 | 759.14 | 149.6  | 141.1 | 566.2  | 1 | 1.667 |
| <i>Pelophylax pleuraden</i>      | 4 | 25°3'  | 54.5   | 83.22 | 435.76 | 16.4   | 14.4  | 347.9  | 1 | 1.241 |
| <i>Philautus gracilipes</i>      | 4 | 23°0'  | 28.72  | 81.39 | 442.45 | 4.25   | 4.13  | 19.7   | 1 | 0.538 |
| <i>Philautus jinxiuensis</i>     | 4 | 22°54' | 27.5   | 86.42 | 420.22 | 6.4    | 5.7   | 61     | 1 | 0.75  |
| <i>Philautus odontotarsus</i>    | 4 | 23°    | 30.02  | 81.39 | 442.45 | 7.01   | 6.99  | 22.1   | 2 |       |
| <i>Polypedates braueri</i>       | 4 | 23°1'  | 45.73  | 79.28 | 446.59 | 30.5   | 28.2  | 98.9   | 2 | 1.091 |
| <i>Polypedates impresus</i>      | 4 | 22°45' | 45.38  | 87.75 | 364.93 | 55.2   | 53.9  | 102.4  | 2 | 1.167 |
| <i>Polypedates megacephalus</i>  | 4 | 29°50' | 43.6   | 69.25 | 742.61 | 51.7   | 48.1  | 62.3   | 2 | 1     |
| <i>Polypedates mutus</i>         | 4 | 25°58' | 40.1   | 62.64 | 750.5  | 61.8   | 58.4  | 64.7   | 2 | 1.4   |
| <i>Pseudorana weiningensis</i>   | 4 | 26°22' | 36.22  | 61.85 | 705.52 | 17.3   | 15.9  | 47.8   | 1 | 0.583 |
| <i>Rana chaochiaoensis</i>       | 4 | 27°10' | 50.4   | 97.1  | 497.94 | 12.7   | 12.6  | 85.4   | 1 | 1.375 |
| <i>Rana chensinensis</i>         | 4 | 29°8'  | 44.3   | 61.69 | 744.89 | 15.9   | 14.2  | 122.7  | 1 | 1.333 |
| <i>Rana hanluica</i>             | 6 | 26°22' | 48.41  | 61.64 | 725.31 | 5.58   | 4.35  | 137.2  | 1 | 0.875 |
| <i>Rana kukunoris</i>            | 4 | 32°34' | 49.4   | 80.45 | 674.69 | 75.1   | 61.3  | 272.4  | 1 | 1.182 |
| <i>Rana omeimontis</i>           | 6 | 29°36' | 51.48  | 93.53 | 695.33 | 15.9   | 14.68 | 141.6  | 1 | 1.185 |
| <i>Rhacophorus chenfui</i>       | 4 | 29°36' | 38.6   | 93.53 | 695.33 | 62.2   | 54.3  | 164.3  | 2 | 1.167 |
| <i>Rhacophorus dennysi</i>       | 4 | 27°52' | 74.89  | 60.44 | 773.19 | 235.2  | 192.4 | 338.4  | 2 | 1.588 |
| <i>Rhacophorus dugritei</i>      | 4 | 29°35' | 42.2   | 88.66 | 692.39 | 27.1   | 25.3  | 100.9  | 2 | 1.5   |
| <i>Rhacophorus feae</i>          | 4 | 22°56' | 104.35 | 84.83 | 434.87 | 1017.1 | 775.1 | 1016   | 2 | 0.97  |

|                                   |   |        |       |       |        |       |       |        |   |       |
|-----------------------------------|---|--------|-------|-------|--------|-------|-------|--------|---|-------|
| <i>Rhacophorus hongchibaensis</i> | 4 | 33°6′  | 65.78 | 76.46 | 832.45 | 51.26 | 51.04 | 88.6   | 2 | 1.108 |
| <i>Rhacophorus hungfuensis</i>    | 4 | 30°55′ | 35.12 | 89.43 | 691.68 | 32.5  | 31.1  | 121.1  | 2 | 1.72  |
| <i>Rhacophorus omeimontis</i>     | 4 | 30°32′ | 59.8  | 81.24 | 671.66 | 187.1 | 180.8 | 192.3  | 2 | 0.98  |
| <i>Rhacophorus rhodopus</i>       | 4 | 20°0′  | 37.51 | 82.02 | 340.44 | 24.5  | 23.4  | 128.2  | 2 | 0.82  |
| <i>Scutiger chintingsensis</i>    | 4 | 29°31′ | 44.28 | 80.04 | 632.15 | 85.2  | 75.8  | 158.2  | 1 | 0.6   |
| <i>Scutiger glandulatus</i>       | 4 | 31°43′ | 66.11 | 78.24 | 645.01 | 67.9  | 54    | 1312.7 | 1 | 0.9   |
| <i>Scutiger muliensis</i>         | 4 | 28°33′ | 72.18 | 91.41 | 564.57 | 119.2 | 85.8  | 2978.3 | 1 | 1.2   |
| <i>Xenophrys leishanensis</i>     | 4 | 26°22′ | 35.55 | 61.98 | 714.21 | 17.2  | 16.3  | 67.4   | 1 | 1     |
| <i>Xenophrys wushanensis</i>      | 4 | 30°36′ | 52.16 | 61.13 | 765.76 | 68.1  | 63.6  | 233.5  | 1 | 1.4   |

**Table S2.** Genbank accession numbers of three nuclear genes (RAG1, RHOD and TYR) and the six mitochondrial genes (CYTB, 12S, 16S, COI, ND2 and ND4) used for phylogeny construction.

| Species                               | 12S       | 16S      | COI       | CYTB     | ND2       | ND4      | RAG1     | RHOD     | TYR      |
|---------------------------------------|-----------|----------|-----------|----------|-----------|----------|----------|----------|----------|
| <i>Amolops chunganensis</i>           | KX645666  | KX645666 | KX645666  | KX645666 | KX645666  | KX645666 | KU840719 |          | KU840752 |
| <i>Amolops granulosus</i>             | KF771286  | MK573802 | NC 044901 | KJ008444 | NC 044901 | KF771306 |          |          |          |
| <i>Amolops kangtingensis</i>          | EF453727  | EF453742 | JN700800  | KJ008423 | KF771330  | KF771307 | EF088240 | DQ360023 | EU076762 |
| <i>Amolops lifanensis</i>             | DQ359981  | MK573810 | MK605628  | KJ008458 | KX269407  |          |          | DQ360034 | DQ360065 |
| <i>Amolops loloensis</i>              | KF771288  | KT750963 | KT750963  | KT750963 | KY357479  | KT750963 | KX208690 |          | KY357486 |
| <i>Amolops mantzorum</i>              | DQ359970  | MK604858 | KJ546429  | KJ008405 | KJ546429  | KF771309 | EF088240 | DQ360023 | DQ360054 |
| <i>Amolops ricketti</i>               | NC_023949 | KF956111 | KF956111  | KF956111 | KF956111  | KF771310 | KX208724 | DQ360009 | EU076764 |
| <i>Amolops sinensis</i>               |           | MK263279 | MK263320  |          | MN958804  |          |          |          |          |
| <i>Amolops torrentis</i>              | MG991872  | DQ204489 | MG991932  |          | MN958785  |          | KU840715 |          |          |
| <i>Amolops yunkaiensis</i>            | MG991847  | MK263276 | MG991913  |          |           |          |          |          |          |
| <i>Aquixalus palpebralis</i>          | EU924625  | GQ285681 | DQ468683  | EU924597 |           |          | GQ285773 | GQ285792 | GQ285810 |
| <i>Babina daunchina</i>               | KU840524  | MF807825 | HQ395353  | KF020631 |           |          | KU840723 |          | KU840782 |
| <i>Bombina maxima</i>                 | DQ925758  | JX893181 | JX893181  | EU531274 | JX893181  | EU789363 |          |          |          |
| <i>Brachytarsophrys chuannanensis</i> | MH406636  | KM504261 | MT162631  | MH407195 |           |          | MH405148 |          |          |
| <i>Brachytarsophrys feae</i>          | KY022194  | KY022194 | MH406362  | MH407193 |           |          | AY523740 | KX812393 |          |
| <i>Bufo andrewsi</i>                  | AF160764  | FJ882808 | MF805611  | AF174502 | AY607301  |          | DQ158353 | DQ283905 |          |
| <i>Bufo gargarizans</i>               | AF205541  | FJ882843 | KY385685  | AF171196 | KU321581  | DQ275350 | KF666177 |          |          |

|                                     |           |           |           |           |           |           |          |          |            |
|-------------------------------------|-----------|-----------|-----------|-----------|-----------|-----------|----------|----------|------------|
| <i>Bufo melanostictus</i>           | AB167899  | KJ697684  | AJ584640  | AF249082  | KT031590  | DQ904392  | KT031693 | AF249097 |            |
| <i>Bufo minshanicus</i>             | KM587710  | KM587710  | KY385799  | KM587710  | KM587710  | KM587710  |          |          |            |
| <i>Bufo raddei</i>                  | KF664854  | KR861720  | KR861720  | AF171210  | KY555701  | KR861720  | KF666186 |          |            |
| <i>Bufo tibetanus</i>               | AF160766  | JX878885  | HM582424  | AF171193  | KX269407  | JX878885  |          |          |            |
| <i>Calluella yunnanensis</i>        | AB634626  | KM509102  | KM509769  |           |           |           |          |          | KM509902   |
| <i>Chirixalus doriae</i>            | EF564446  | AB813159  | KR087631  | GQ204538  |           |           | GQ204602 | GQ204657 | DQ347165   |
| <i>Chirixalus vittatus</i>          | EF564448  | DQ283134  | KR087649  | EU924596  |           |           | GQ204603 | GQ204658 | EU924568   |
| <i>Feirana quadranus</i>            | GQ225906  | AB200967  |           |           | GQ225933  |           | HM163591 | EU979886 | EU979981   |
| <i>Fejervarya multistriata</i>      | AB277282  | KR071859  | KR071859  | AB296096  | KR071859  | KR071859  | AB526660 | DQ458271 | AB500265   |
| <i>Hyla annectans chuanxiensis</i>  | KP742565  | KP742695  |           | FJ226919  |           |           |          |          |            |
| <i>Hyla annectans jingdongensis</i> | KP742564  | KP742693  | JN700883  | AY843821  |           |           | AY844388 | AY844574 | AY844045   |
| <i>Hyla annectans wulingensis</i>   | KP742563  | KP742692  |           |           |           |           |          |          |            |
| <i>Hyla chinensis</i>               | AY458593  | AY458593  | AY458593  | AY458593  | AY458593  | AY458593  | KX208743 |          |            |
| <i>Hyla sanchiangensis</i>          | MT561180  | MT561180  | MT561180  | MT561180  | MT561180  | MT561180  |          |          |            |
| <i>Hyla tsinlingensis</i>           | KP742646  | KP212702  | KP212702  | JX870448  | KP212702  | KP212702  |          |          |            |
| <i>Hylarana guentheri</i>           | KF185024  | KR264039  | KM035413  | KM035413  | KM035413  | KM035413  | KX208782 | AY322216 | KR264440   |
| <i>Hylarana nigrotympanica</i>      |           | DQ650392  | KR087688  |           | FJ417171  |           | EF088267 |          | EU076793.1 |
| <i>Kaloula pulchra</i>              | AY458595  | DQ283398  | AY458595  | AY458595  | AY458595  | AY458595  | KX208748 | DQ284011 | KC180289   |
| <i>Kaloula rugifera</i>             | NC_029409 | KT878719  | KT878719  | KT878719  | KT878719  |           |          |          |            |
| <i>Kaloula verrucosa</i>            | JX678893  | NC 039411 | NC 039411 | NC_039411 | NC 039411 | NC 039411 |          |          |            |
| <i>Leptobrachella bijie</i>         |           | MK414535  |           |           |           |           |          |          |            |
| <i>Leptobrachium boringii</i>       | KJ630505  | MH643882  | KJ630505  | MH643882  | KJ630505  | KJ630505  | MH056123 | KX812400 |            |
| <i>Leptobrachella feii</i>          |           | MT302635  |           |           |           |           |          |          |            |
| <i>Leptolalax oshanensis</i>        | NC_020610 | KX811928  | KC460337  | KC460337  | KC460337  | KC460337  | MH056094 | MH056153 |            |
| <i>Leptolalax ventripunctatus</i>   | LC201979  | KX811929  | KR087772  |           |           |           | MH056090 | MH056133 |            |
| <i>Limnonectes fujianensis</i>      | AY974191  | HM067232  | NC 007440 | FJ349544  | NC 007440 | NC 007440 | KX208751 | DQ458260 | DQ458275   |
| <i>Lithobates catesbeianus</i>      | MN241124  | DQ289127  | AB761267  | AF205089  | AF314016  | MN241124  | AB612037 | S79840   | DQ360044   |
| <i>Megophrys daweimontis</i>        |           | KX811868  | KX812124  |           |           |           | KX812250 | KX812362 |            |
| <i>Megophrys jingdongensis</i>      | MH406617  | KX811875  | KR087946  | MH407176  |           |           | MH405129 | KX812354 |            |
| <i>Megophrys kuatunensis</i>        | MF667850  | MN563765  | MF667916  | MH407036  |           |           | MH404982 |          |            |
| <i>Megophrys major</i>              | KY022311  | DQ283374  | KR087949  | MH407011  |           |           | MH405013 |          | DQ282986   |
| <i>Megophrys minor</i>              | MH406474  | KJ560389  | MF667893  | MH407028  |           |           | MH404973 | KX812325 |            |
| <i>Megophrys omeimontis</i>         | EF397242  | EF397242  | KP728257  | AY561314  | KX021971  | KP728257  | EF397280 | KX812347 |            |

|                                |           |           |           |           |           |           |          |          |          |
|--------------------------------|-----------|-----------|-----------|-----------|-----------|-----------|----------|----------|----------|
| <i>Megophrys parva</i>         | MH406568  | KY022217  | MH406297  | MH407127  |           |           | MH405078 |          |          |
| <i>Megophrys shapingensis</i>  | NC_018785 | JX458090  | JX458090  | AY561310  | MT561180  | JX458090  | KX812274 | KX812317 |          |
| <i>Megophrys spinata</i>       |           | KX811864  | KX812120  | AY561317  |           |           | KX812231 | KX812349 |          |
| <i>Microhyla berdmorei</i>     | AB634603  | LC465690  | KR087785  | LC465615  |           |           | LC465764 | KU840621 | KU840794 |
| <i>Microhyla butleri</i>       | KT285802  | KT285802  | KT972718  | KT972718  | KT972718  | KT285802  | EF396094 |          |          |
| <i>Microhyla heymonsi</i>      | AY458596  | MT080958  | AY458596  | AY458596  | AY458596  | AY458596  | KX208756 |          | EF395979 |
| <i>Microhyla mixtura</i>       | NC_038130 | LC465669  | NC 038130 | NC_038130 | NC_038130 | NC 038130 | LC465744 |          |          |
| <i>Microhyla ornata</i>        | JN541317  | DQ512876  | DQ512876  | AB201223  | DQ512876  | DQ512876  | AY364198 | AY364383 | KC180221 |
| <i>Microhyla pulchra</i>       | NC_024547 | LC465692  | KF798195  | KF798195  | KF798195  |           | EF396093 | KU840623 | EF395980 |
| <i>Micryletta inornata</i>     | KC822493  | KM509167  | AB611965  |           |           |           | EF396096 |          | EF395981 |
| <i>Nanorana parkeri</i>        | EU979723  | KP317482  | KP317482  | KJ434188  | GQ225878  | KP317482  | HM163584 | EU979872 | DQ458276 |
| <i>Nanorana pleskei</i>        | EU979781  | HQ324232  | HQ324232  | HQ324232  | GQ225879  | HQ324232  | HM163586 | EU979871 | EU979962 |
| <i>Nanorana ventripunctata</i> | EU979717  | NC 039094 | NC 039094 | NC_039094 | NC_039094 | NC 039094 | HM163585 | EU979866 | EU979959 |
| <i>Nidirana leishanensis</i>   | MK293797  | MN946454  | MN945210  |           |           |           |          |          | MK293864 |
| <i>Nidirana yae</i>            |           | MN295230  | MN295238  |           |           |           |          |          |          |
| <i>Occidozyga martensii</i>    | GU177877  | DQ283357  | GU177877  | GU177877  | GU177877  | GU177877  | KU243099 | DQ283978 | KU243119 |
| <i>Occidozyga lima</i>         | AB488880  | DQ283224  | KR087832  | AB488857  |           |           | AB488961 | AB489042 | AB489018 |
| <i>Odorrana grahami</i>        | KU840529  | KF185051  | MH697567  |           | EU861580  | KF771313  | EF088257 | DQ360016 | DQ360047 |
| <i>Odorrana graminea</i>       | NC_050884 | KF185037  | NC 050884 | NC_050884 | KR338281  | NC 050884 | KP221672 | KU840632 | KP191588 |
| <i>Odorrana hainanensis</i>    | NC_034984 | KX056491  | KX056491  | KX056491  | KX056491  | KX056491  | KU840725 | KU840664 |          |
| <i>Odorrana hejiangensis</i>   | KU840531  | KF185052  |           |           | KR338211  |           | KU840727 | KU840683 | KU840788 |
| <i>Odorrana huanggangensis</i> | MK650099  | KT315387  |           |           | MH193613  |           |          |          |          |
| <i>Odorrana kuangwuensis</i>   | KF184998  | KF185034  |           | KU217313  |           |           |          |          |          |
| <i>Odorrana kweichowensis</i>  | MH193535  | MH193548  |           |           | MH193602  |           |          |          |          |
| <i>Odorrana lungshengensis</i> | KF185018  | KF185054  | KF771336  |           | KX269407  |           |          |          |          |
| <i>Odorrana margaretae</i>     | DQ359964  | KF185035  | KJ815050  | KU217223  | EU861592  | KJ815050  | EF088261 | DQ360017 | DQ360048 |
| <i>Odorrana nanjiangensis</i>  | KF185006  | KF185042  |           |           |           |           |          |          |          |
| <i>Odorrana nasuta</i>         | KF185017  | KF185053  |           |           |           |           |          |          |          |
| <i>Odorrana schmackeri</i>     | KP732086  | KF185047  | KJ149452  | KP732086  | GU812150  | KP732086  | KX208784 | DQ360020 | KP191589 |
| <i>Odorrana tiannanensis</i>   | KF185008  | KF185044  | KR087846  |           |           |           |          |          |          |
| <i>Ophryophryne microstoma</i> | MH406565  | DQ283391  | MK524157  | MH407134  |           |           | KY022234 | KX812398 |          |
| <i>Oreolalax rugosus</i>       | EF397254  | EF397254  |           |           |           |           |          |          |          |
| <i>Paa boulengeri</i>          | EU979791  | KC686711  | KX233867  | JX676597  | KX233867  | KF199152  | HM163604 | EU979918 | EU980033 |

|                                  |           |                        |           |           |           |           |          |          |          |
|----------------------------------|-----------|------------------------|-----------|-----------|-----------|-----------|----------|----------|----------|
| <i>Paa robertingeri</i>          | KY441640  | KY441640               | KY441640  | KY441640  | GQ225880  | KY441640  |          | DQ458265 | DQ458280 |
| <i>Paa sichuanensis</i>          | KU139984  | Odorrana kweichowensis |           |           |           |           |          |          |          |
| <i>Paa yunnanensis</i>           | GQ225869  |                        | KF199150  | KF199150  | GQ225878  | KF199150  | HM163593 | DQ458263 | EU979976 |
| <i>Pelophylax fukienensis</i>    | AB029941  |                        | MH034303  | JQ995141  |           |           |          |          | GU978236 |
| <i>Pelophylax hubeiensis</i>     | AF205547  | AF315137               |           | JQ995009  |           |           |          |          |          |
| <i>Pelophylax nigromaculatus</i> | AB705490  | KX269216               | KT878718  | DQ006266  | GU812150  | KT878718  | AB360184 | DQ283838 | DQ360045 |
| <i>Pelophylax pleuraden</i>      | JN541324  | JQ621943               | HQ395289  | KR264150  |           | KF771303  | KR264384 | DQ360011 | DQ360042 |
| <i>Philautus gracilipes</i>      | EF564451  | DQ283051               | KR087672  | EU924593  |           |           | GQ285764 | DQ283780 | GQ285807 |
| <i>Philautus jinxiuensis</i>     | EF564452  | EU215525               | KR087673  | EU924599  |           |           | GQ285763 | EU924543 | EU924571 |
| <i>Philautus odontotarsus</i>    | EF564460  | AB933303               | KX554578  | EU924594  | DQ287141  |           | KX208772 | EU215579 | KX554685 |
| <i>Polypedates braueri</i>       | NC_042797 | AB728007               | KT921226  | NC_042797 | NC 042797 | NC 042797 | AB728251 | AB728274 | AB728308 |
| <i>Polypedates impresus</i>      | MK481034  | KF053209               | KR087863  |           |           |           |          | MW266002 | MW269977 |
| <i>Polypedates megacephalus</i>  | KU840483  | KC465836               | AY458598  | AB451722  | NC 043955 | NC 043955 | EU924517 | EU924545 | KC180271 |
| <i>Polypedates mutus</i>         | AY880608  | MW266017               | MG935684  | MK622900  |           | MK622900  | GQ285770 | EU215581 | EU215611 |
| <i>Pseudorana weiningensis</i>   | DQ359959  | KX269217               |           | KX269362  | KX269432  |           | KX269582 | DQ360012 | DQ360050 |
| <i>Rana chaochiaoensis</i>       | DQ359975  | KX269192               | KU246048  | AF274927  | KU246048  | KF771302  | KX269557 | DQ360028 | DQ360059 |
| <i>Rana chensinensis</i>         | AB058853  | KF185061               | MT418625  | AF077396  | GU812150  | KF771317  | KX269551 | DQ360030 | DQ360061 |
| <i>Rana hanluica</i>             | KX269191  | KX269191               | MT418638  | KX269338  | KX269407  |           | KX269556 |          | KX269784 |
| <i>Rana kukunoris</i>            | KX269185  | KU246049               | MN733918  | JX486345  | MN733918  | MN733918  | GQ285780 | GQ285798 | GQ285816 |
| <i>Rana omeimontis</i>           | DQ289083  | KU246050               | KU246050  | AF274928  | KU246050  | KU246050  | KX269558 |          | KX269785 |
| <i>Rhacophorus chenfui</i>       | GQ204763  | JX219431               | KP996734  | EU924603  |           |           | EU924519 | EU924547 | KU840751 |
| <i>Rhacophorus dennysi</i>       | DQ019592  | KT191129               | LC386527  | EU924604  | KT191129  | KX233869  | DQ019512 | EU215575 | EU924576 |
| <i>Rhacophorus dugritei</i>      | EF564471  | LC010584               | KP996709  | EU924605  | MK357046  |           | GQ285768 | EU215571 | EU215601 |
| <i>Rhacophorus feae</i>          | EF564474  | EU215544               | LC386530  | EU924606  |           |           | EU924522 | EU924550 | EU924578 |
| <i>Rhacophorus hongchibaensi</i> | JN688882  | JN688882               |           |           |           |           |          | JN688898 | JN688907 |
| <i>Rhacophorus hungfuensis</i>   | EU215538  | EU215538               | KP996733  |           | MK357046  |           |          | JN688903 | JN688913 |
| <i>Rhacophorus omeimontis</i>    | EF564493  | NC 046387              | NC 046387 | EU924612  | KP895687  | NC 046387 | EU924528 | EU215565 | KU840753 |
| <i>Rhacophorus rhodopus</i>      | EF564507  | JX219439               | LC386538  | EU924616  |           |           | EU924532 | EU215561 | EU924588 |
| <i>Scutiger chintingensis</i>    | EF397270  | EF397270               | KY310878  | KY310930  |           | KY310991  | KY311043 |          |          |
| <i>Scutiger glandulatus</i>      | EF397276  | EF397271               | KY310883  | KY310935  |           | KY310995  | KY311049 |          |          |
| <i>Scutiger muliensis</i>        | EF397277  | EF397272               |           |           |           |           | EF397302 |          |          |
| <i>Xenophrys leishanensis</i>    |           | MK005310               |           |           |           |           | MK005318 |          |          |
| <i>Xenophrys wushanensis</i>     | MH406469  | MH406736               | MH406188  | MH407018  |           |           | MH404963 | KX812319 |          |





**Figure S1.** The relationship between adult sex ratio and residual testes size asymmetry across 116 species of anurans. Residual testes size asymmetry was estimated as residuals from the regression of  $\log_{10}$ -transformed SVL and  $\log_{10}$ -transformed testes size asymmetry.

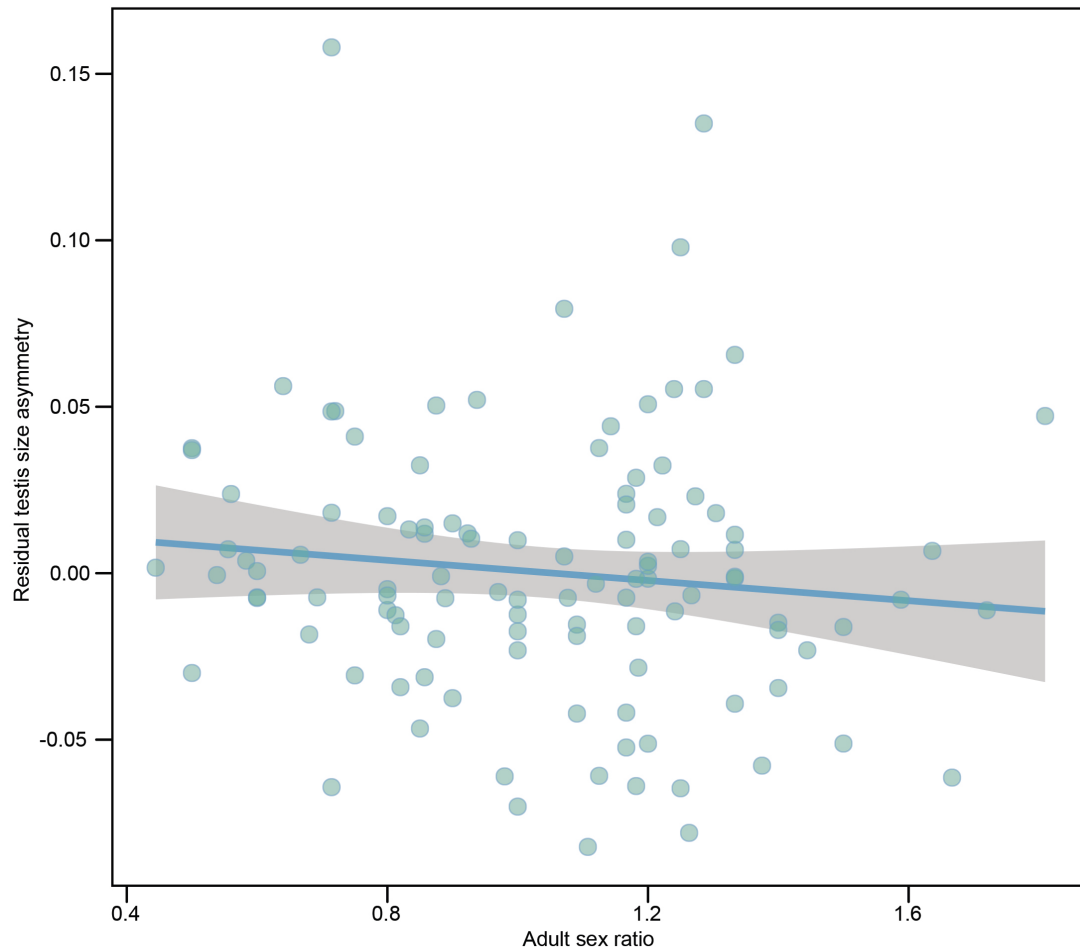

**Figure S2.** Non-significant difference in residual size asymmetry between monandry and polyandry across 116 species of anurans. Residual testes size asymmetry was estimated as residuals from the regression of  $\log_{10}$ -transformed SVL and log-transformed testes size asymmetry.

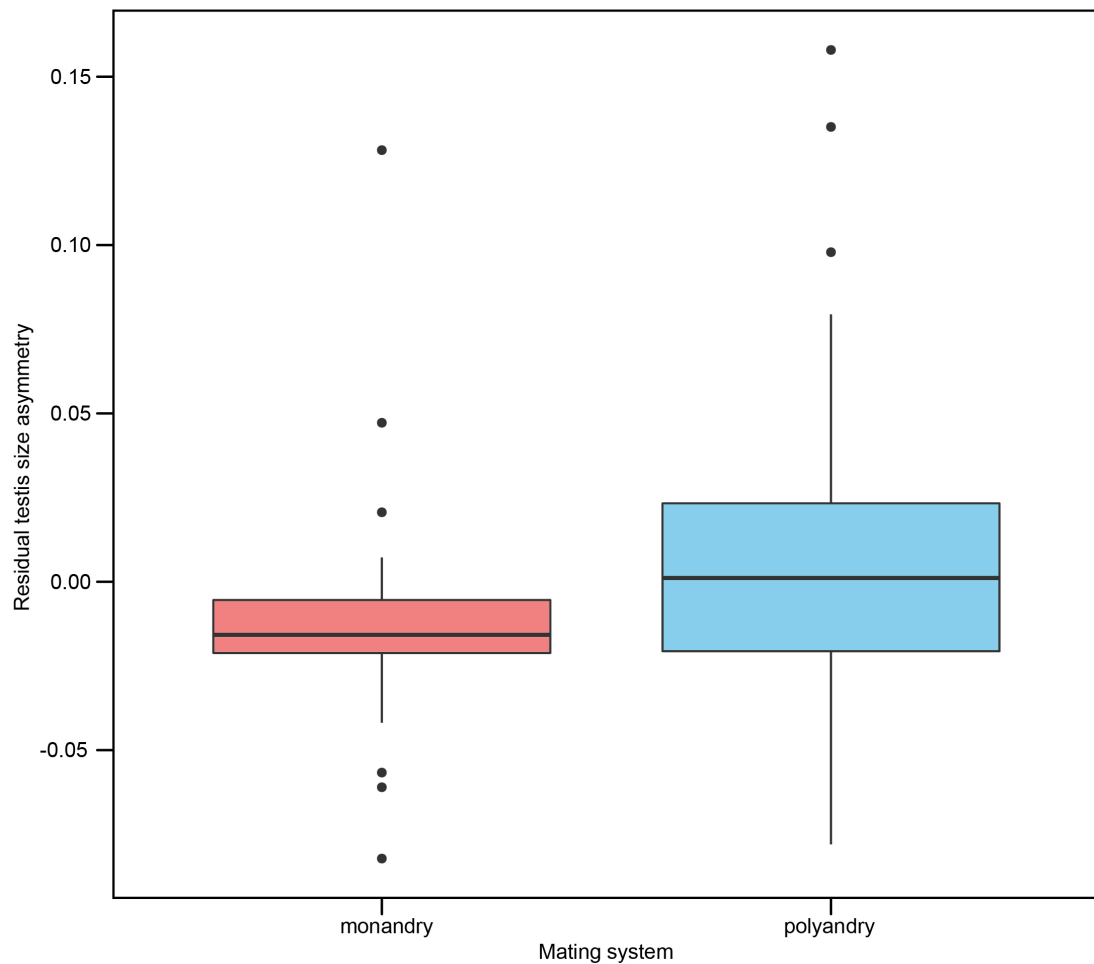

**Figure S3.** The relationships between residual size asymmetry and latitude across 116 species of anurans. Residual testes size asymmetry was estimated as residuals from the regression of  $\log_{10}$ -transformed SVL and  $\log_{10}$ -transformed testes size asymmetry.

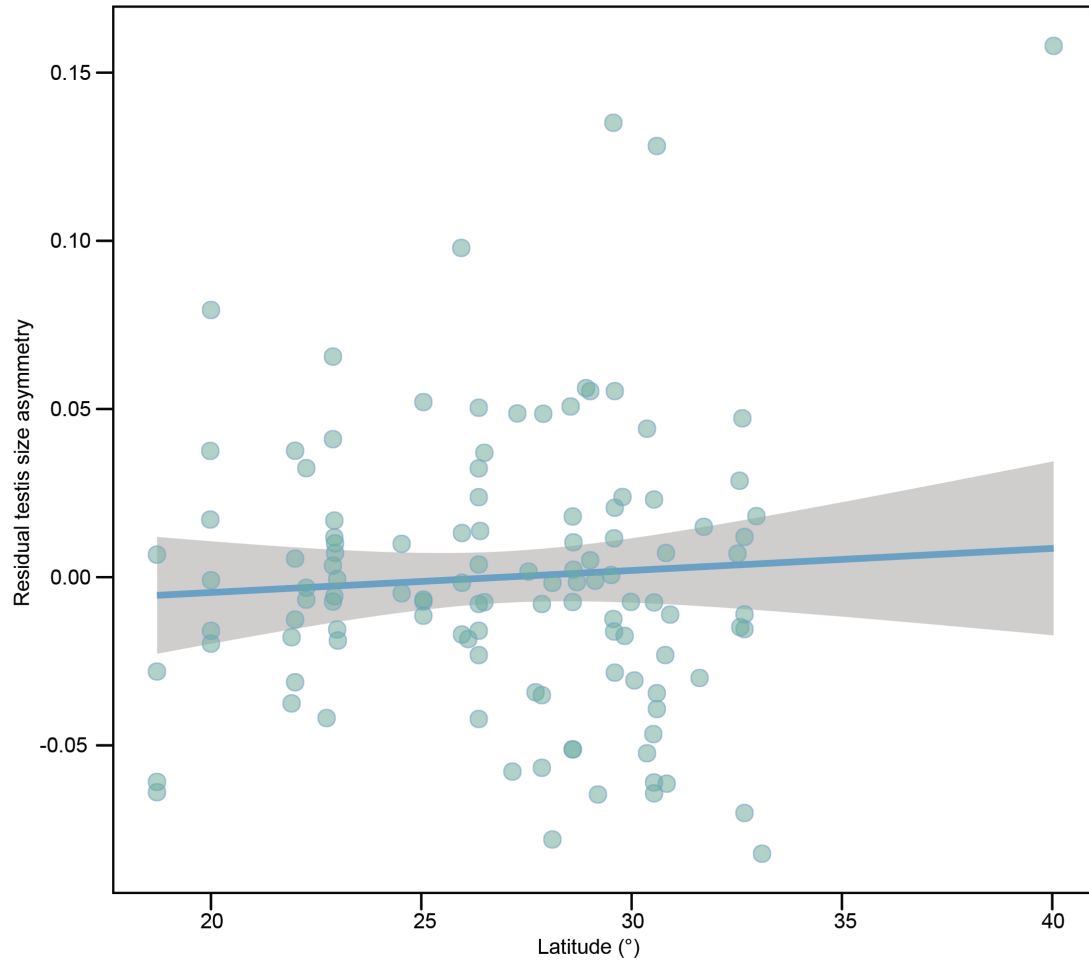

**Figure S4.** The relationships between residual size asymmetry and temperature seasonality (a) and precipitation seasonality (b) across 116 species of anurans. Residual testes size asymmetry was estimated as residuals from the regression of  $\log_{10}$ -transformed SVL and  $\log_{10}$ -transformed testes size asymmetry.

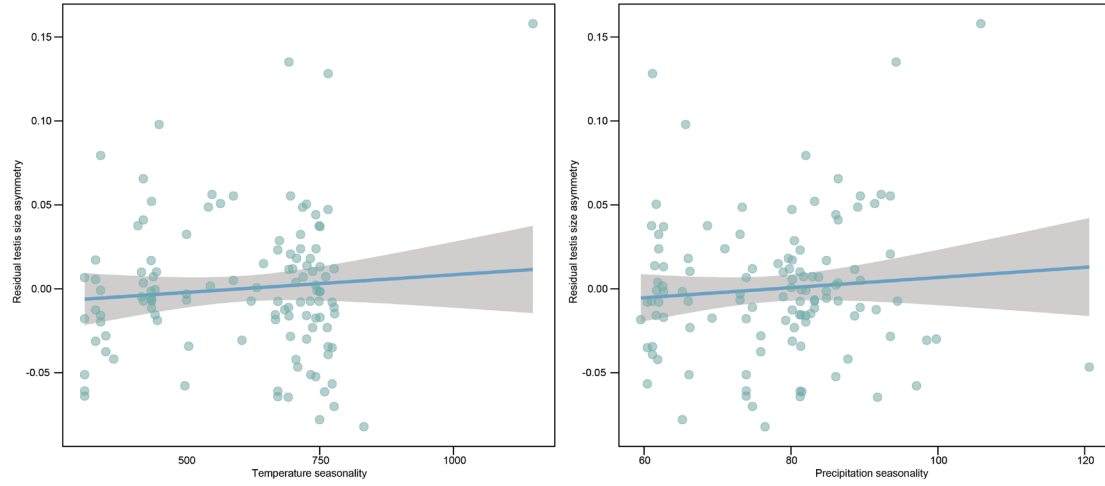

Supplement: s1 [file s1]
